# Supplementary material for: Clear Cell Adenocarcinoma of the Urinary Bladder Is a Glycogen-Rich Tumor with Poorer Prognosis
Source: PubMed Central journal article supplement (PMC7019566; doi:10.3390/jcm9010138), 2020-01-03
Supplement: jcm-09-00138-s001.pdf [file jcm-09-00138-s001.pdf]

**Table S1.** Incidence and mortality of clear cell carcinoma of the urinary bladder from 2004–2015 per million population.

|           | Overall (95% Confidence Interval) | Female (95% Confidence Interval) | Male (95% Confidence Interval) |
|-----------|-----------------------------------|----------------------------------|--------------------------------|
| Incidence | 0.087 (0.069–0.107)               | 0.091 (0.068–0.119)              | 0.084 (0.059–0.116)            |
| Mortality | 0.064 (0.049–0.081)               | 0.058 (0.040–0.082)              | 0.074 (0.050–0.106)            |

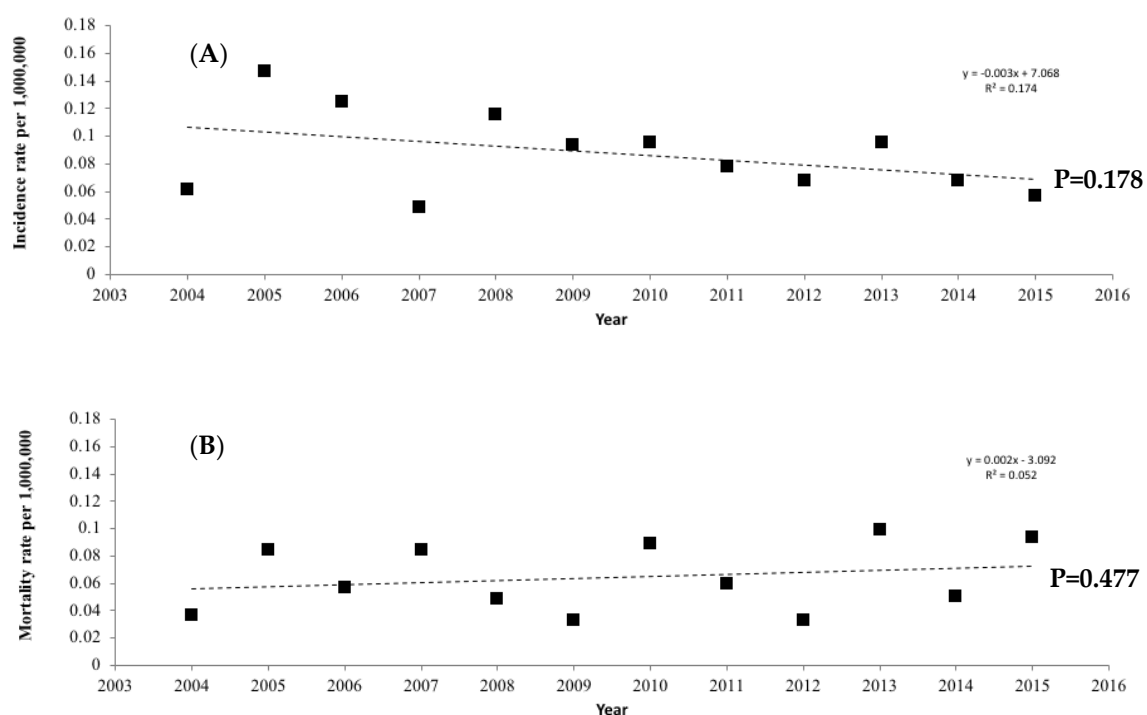

**Figure S1.** (A) Incidence of clear cell adenocarcinoma per million individuals in the US population. (B) Mortality of clear cell adenocarcinoma per million individuals in the US population.

**Table S2.** Multivariable analysis of survival for all urinary bladder patients.

|                            | Reference            | p-Value | With Staging |        |        | Without Staging |       |        |       |
|----------------------------|----------------------|---------|--------------|--------|--------|-----------------|-------|--------|-------|
|                            |                      |         | HR           | 95% CI |        | p-Value         | HR    | 95% CI |       |
|                            |                      |         |              | Lower  | Upper  |                 |       | Lower  | Upper |
| Clear cell adenocarcinoma  | All other carcinomas | 0.636   | 0.930        | 0.690  | 1.255  | 0.018           | 1.435 | 1.064  | 1.936 |
| Age                        |                      | <0.001  | 1.056        | 1.055  | 1.057  | <0.001          | 1.055 | 1.054  | 1.056 |
| Sex                        | Female               | 0.009   | 1.025        | 1.006  | 1.043  | 0.011           | 0.977 | 0.959  | 0.995 |
| Race                       | White                | <0.001  |              |        |        | <0.001          |       |        |       |
| Black                      |                      | <0.001  | 1.306        | 1.265  | 1.347  | <0.001          | 1.434 | 1.390  | 1.480 |
| Other                      |                      | <0.001  | 0.837        | 0.803  | 0.873  | <0.001          | 0.854 | 0.819  | 0.891 |
| Unknown                    |                      | <0.001  | 0.357        | 0.310  | 0.412  | <0.001          | 0.314 | 0.272  | 0.362 |
| Grade                      | Grade I              | <0.001  |              |        |        | <0.001          |       |        |       |
| Grade II                   |                      | 0.002   | 1.054        | 1.02   | 1.089  | <0.001          | 1.126 | 1.09   | 1.164 |
| Grade III                  |                      | <0.001  | 1.342        | 1.298  | 1.388  | <0.001          | 2.158 | 2.09   | 2.228 |
| Grade IV                   |                      | <0.001  | 1.274        | 1.232  | 1.317  | <0.001          | 2.105 | 2.04   | 2.172 |
| Unknown                    |                      | <0.001  | 1.195        | 1.154  | 1.237  | <0.001          | 1.436 | 1.387  | 1.486 |
| AJCC6th stage              | Stage 0              | <0.001  |              |        |        | -               |       |        |       |
| Stage 1                    |                      | <0.001  | 1.495        | 1.461  | 1.53   |                 | -     | -      | -     |
| Stage 2                    |                      | <0.001  | 3.507        | 3.412  | 3.605  |                 | -     | -      | -     |
| Stage 3                    |                      | <0.001  | 4.904        | 4.721  | 5.095  |                 | -     | -      | -     |
| Stage 4                    |                      | <0.001  | 11.626       | 11.276 | 11.987 |                 | -     | -      | -     |
| Unknown                    |                      | <0.001  | 2.676        | 2.578  | 2.777  |                 | -     | -      | -     |
| Surgery                    | None                 | <0.001  |              |        |        | <0.001          |       |        |       |
| Local + partial cystectomy |                      | <0.001  | 0.711        | 0.691  | 0.732  | <0.001          | 0.533 | 0.519  | 0.547 |
| Total cystectomy           |                      | <0.001  | 0.407        | 0.392  | 0.423  | <0.001          | 0.841 | 0.812  | 0.871 |
| Surgery NOS                |                      | <0.001  | 0.641        | 0.558  | 0.737  | <0.001          | 0.777 | 0.677  | 0.893 |
| Unknown                    |                      | <0.001  | 0.634        | 0.543  | 0.74   | <0.001          | 0.532 | 0.456  | 0.621 |
| Radiation                  | None                 | <0.001  |              |        |        | <0.001          |       |        |       |
| Beam radiation             |                      | 0.883   | 0.998        | 0.968  | 1.029  | <0.001          | 2.182 | 2.12   | 2.246 |
| Other radiation            |                      | 0.595   | 0.958        | 0.818  | 1.122  | <0.001          | 1.864 | 1.592  | 2.182 |
| Unknown                    |                      | <0.001  | 1.287        | 1.184  | 1.399  | <0.001          | 1.595 | 1.467  | 1.733 |

Not applicable.
